# Supplementary material for: The ethylene glycol-mediated sol–gel synthesis of nano AlF3: structural and acidic properties after different post treatments
Source: Royal Society of Chemistry journal article supplement (doi:10.1039/d1dt03506a), 2021-12-03
Supplement: d1dt03506a1.pdf [file d1dt03506a1.pdf]

**Supporting information**

**The ethylene glycol-mediated sol-gel synthesis of nano**

**AlF<sub>3</sub>: structural and acidic properties after different post-treatments**

Wei Mao,<sup>a\*</sup> Yanbo Bai,<sup>a</sup> Zhaohua Jia,<sup>a</sup> Yue Qin,<sup>a</sup> Bo Wang,<sup>a</sup> Wei Zhang,<sup>a</sup> Jian Lu,<sup>a\*</sup>

Erhard Kemnitz<sup>b\*</sup>

a. State Key Laboratory of Fluorine & Nitrogen Chemicals, Xi'an Modern Chemistry Research Institute, Xi'an, Shaanxi 710065, China.

b. Department of Chemistry, Humboldt-Universität zu Berlin, Brook-Taylor-Strasse 2, D-12489 Berlin, Germany.

\* Corresponding Author, E-mail: hz\_mw@163.com (W. Mao); lujian204@gmail.com (J. Lu); erhard.kemnitz@chemie.hu-berlin.de (E. Kemnitz).

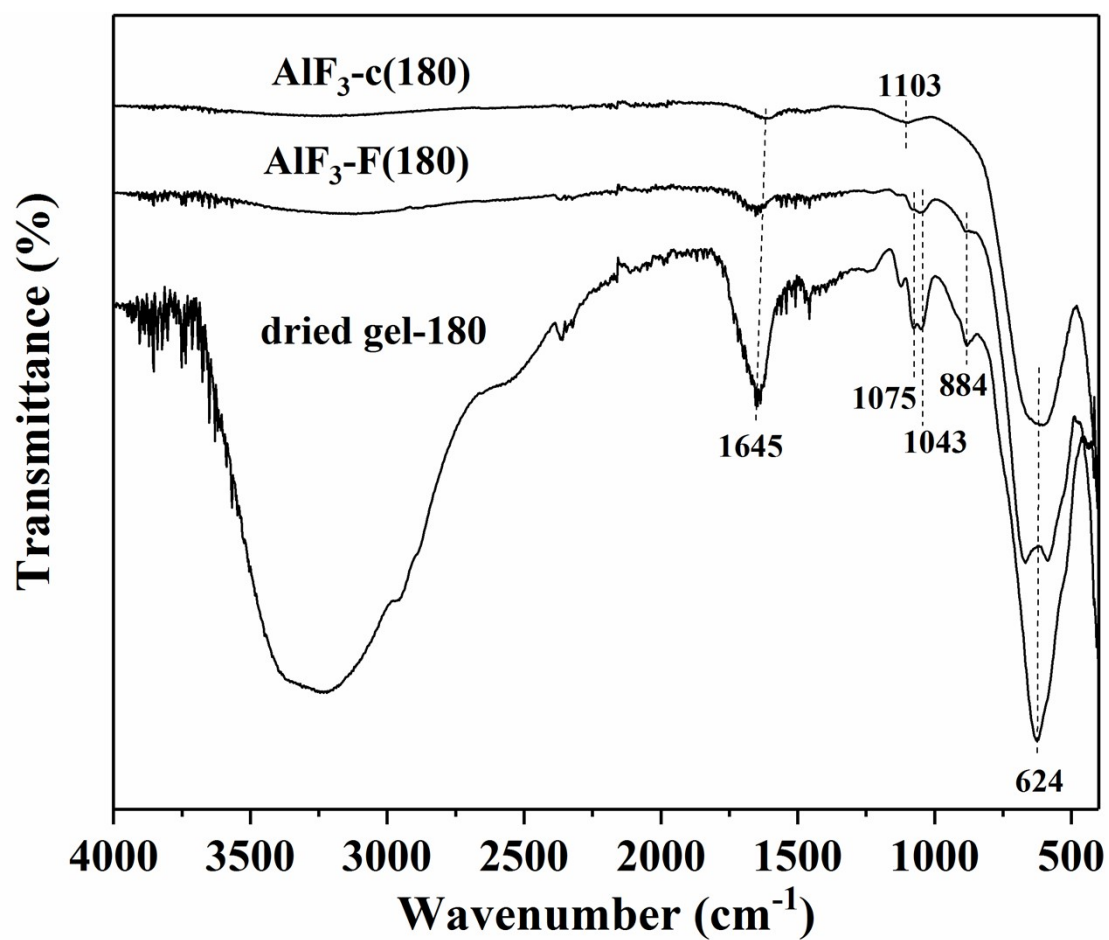

Figure S1 FT-IR spectra of the precursor (dried gel-180) and the resulting nano AlF<sub>3</sub> samples (AlF<sub>3</sub>-F(180) and AlF<sub>3</sub>-c(180)).

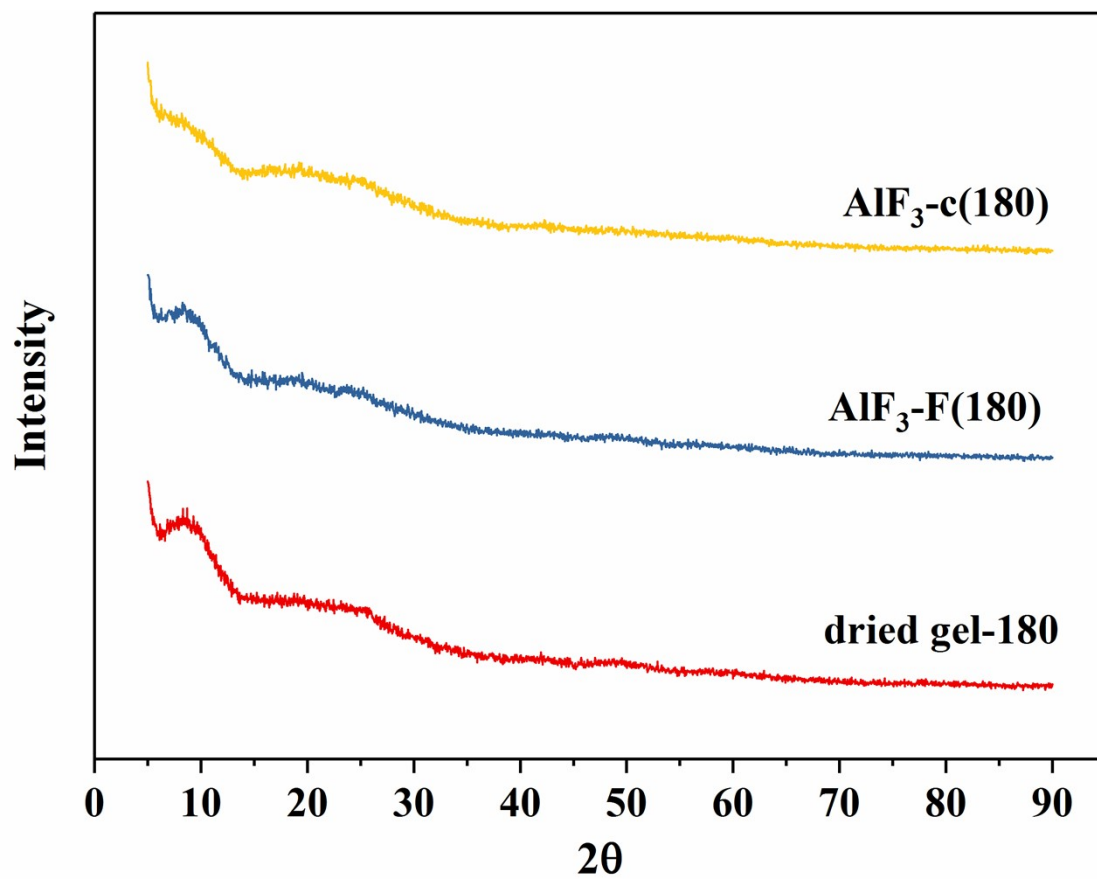

Figure S2 XRD patterns of the precursor (dried gel-180) and the resulting nano AlF<sub>3</sub> samples (AlF<sub>3</sub>-F(180) and AlF<sub>3</sub>-c(180)).

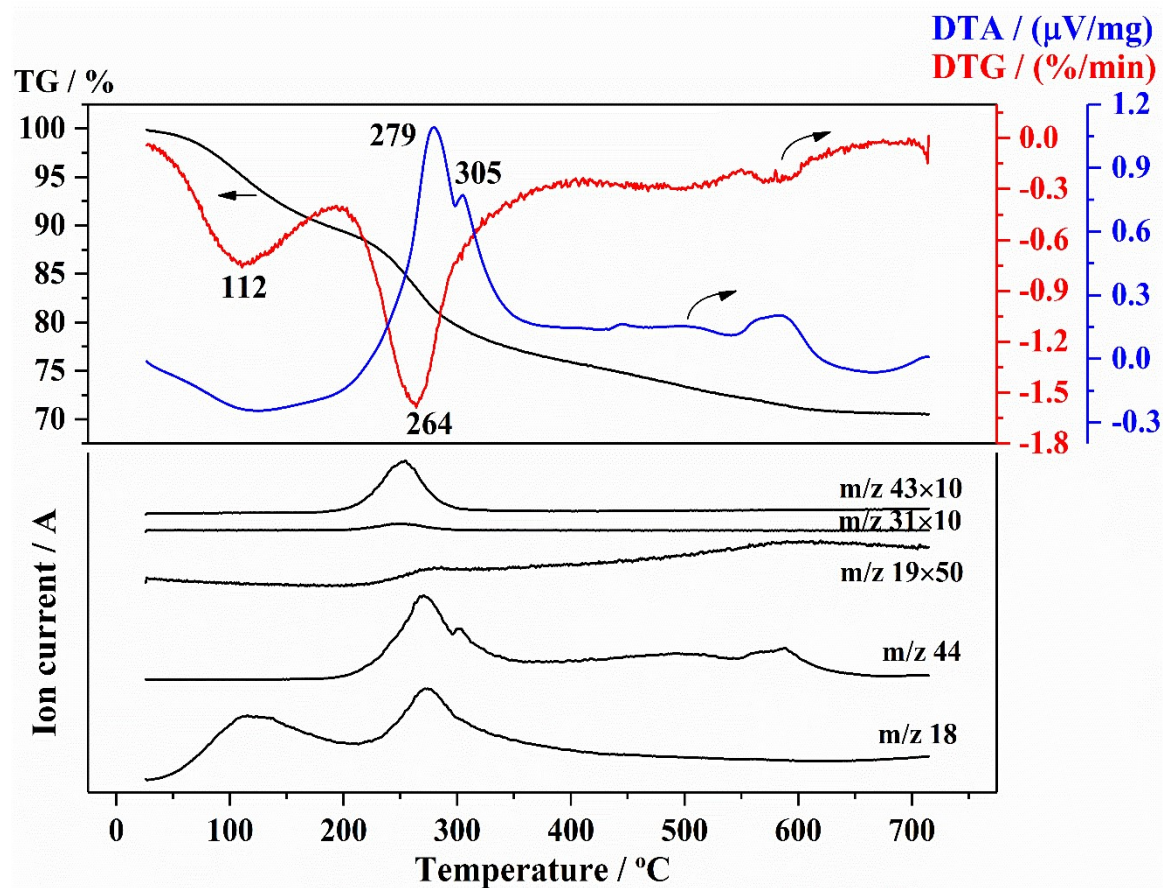

Figure S3 TG-DTA-MS of dried gel-180 under air. (a) TG-DTA curve and (b) MS curves of  $m/z$  18 ( $\text{H}_2\text{O}^+$ ),  $m/z$  19 ( $\text{F}^+$ ),  $m/z$  31 (EG fragment),  $m/z$  43 (isopropanol fragment) and  $m/z$  44 ( $\text{CO}_2^+$ ).

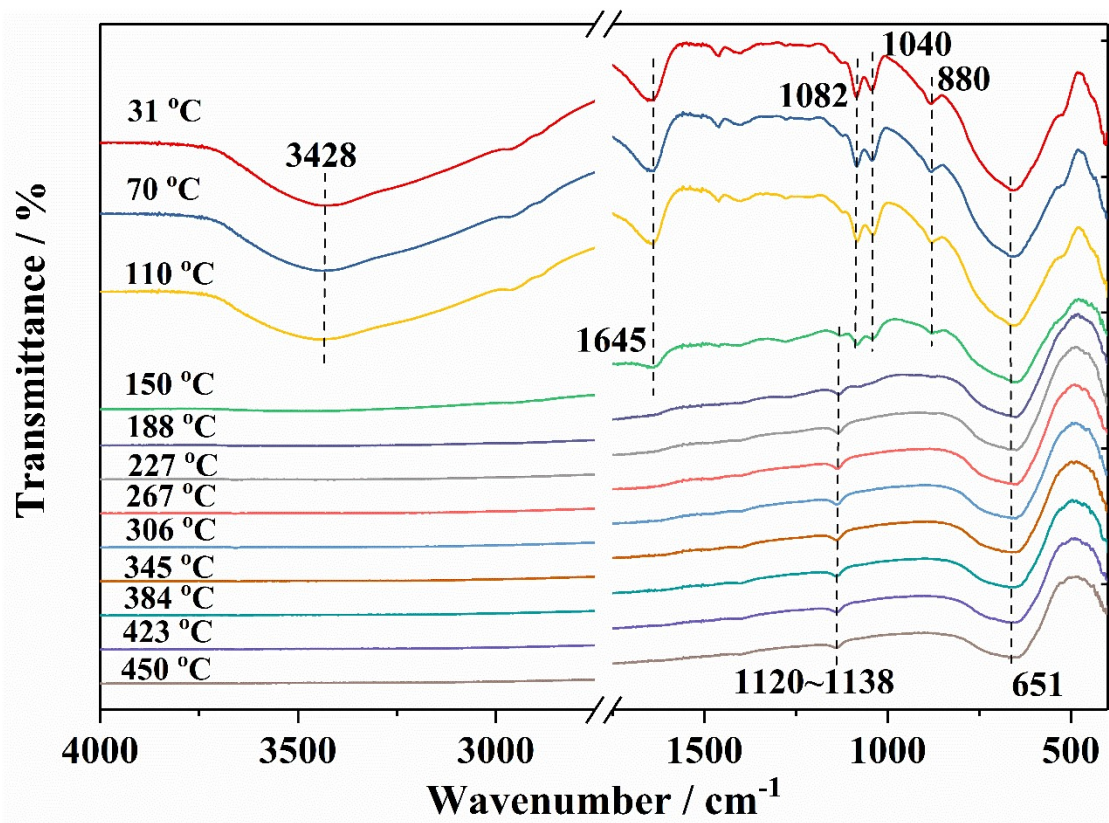

Figure S4 in situ FT-IR spectra of dried gel-120 calcined in the temperature range of room temperature~450 °C.

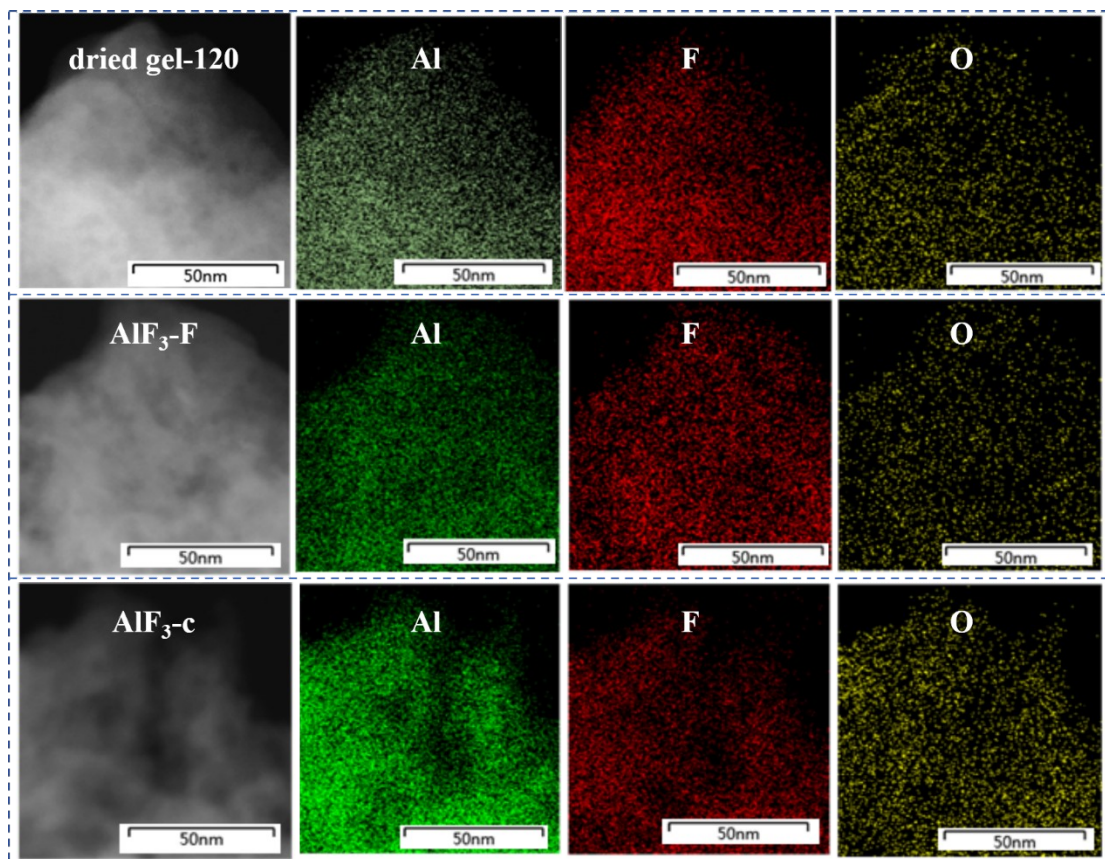

Figure S5 TEM element mapping of the precursor (dried gel-120) and the resulting nano AlF<sub>3</sub> samples (AlF<sub>3</sub>-F and AlF<sub>3</sub>-c).

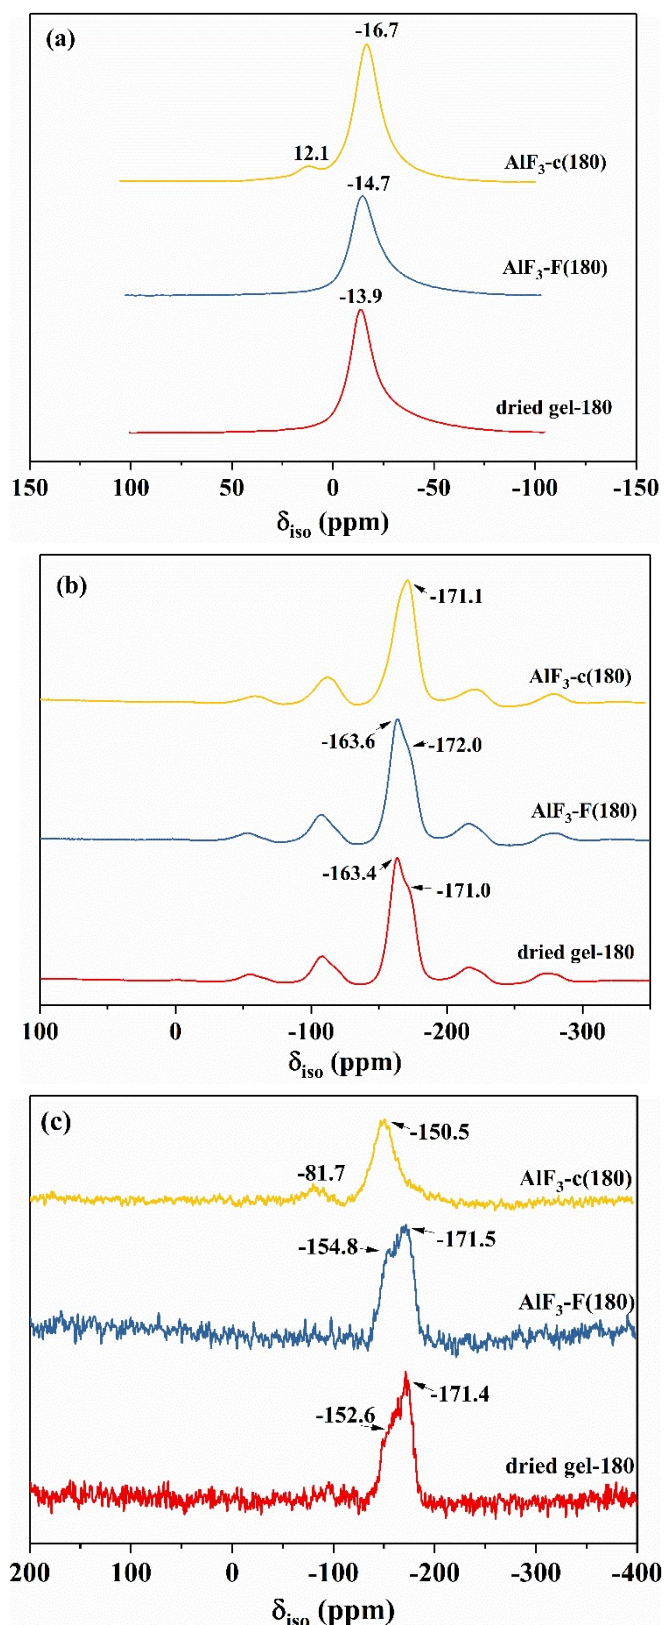

Figure S6 Solid-state MAS NMR spectra of the precursor (dried gel-180) and the resulting nano  $\text{AlF}_3$  after different post treatments. (a) central transition of  $^{27}\text{Al}$  NMR spectra, (b)  $^{19}\text{F}$  MAS NMR spectra and (c) rotor synchronized  $^{19}\text{F}$  spin-echo MAS NMR spectra.

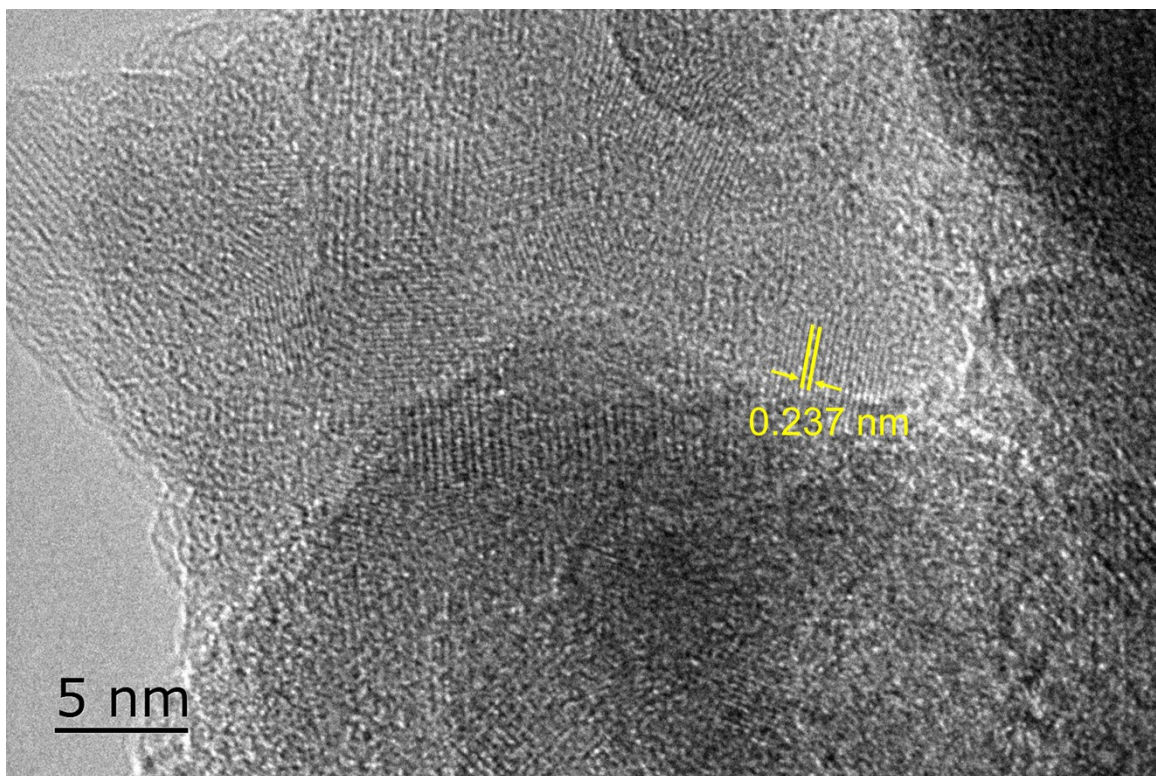

Figure S7 HRTEM of AlF<sub>3</sub>-c.



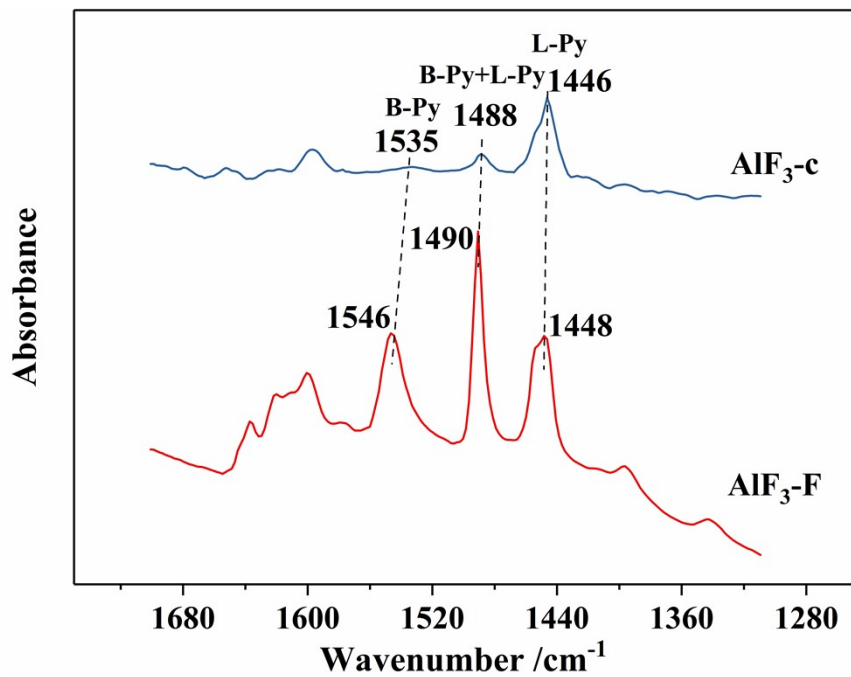

Figure S8 IR spectra of pyridine adsorbed on AlF<sub>3</sub>-F and AlF<sub>3</sub>-c.
